# Supplementary material
Source: MDPI journal article supplement (https://www.mdpi.com/2071-1050/16/8/3381)
Supplement: s1 [file s1]

## **Supplementary Material**

# **The Relation Between Atmospheric Aerosol Concentration and Sars-CoV-2 Variants' Infection and Mortality Rates in the United States: A Remote-Sensing Perspective**

**Yasin Elshorbany, Sarah Mixson, Laila Marcum and Jason L. Salemi**

Table S1: List of counties in the state of California for which CDC deaths and cases were retrieved.

| <b>County</b> | <b>Latitude</b> | <b>Longitude</b> | <b>Population</b> |
|---------------|-----------------|------------------|-------------------|
| Butte         | 39.6672776      | -121.60053       | 219186            |
| Colusa        | 39.1788196      | -122.23317       | 21547             |
| Glenn         | 39.598759       | -122.39385       | 28393             |
| Lake          | 39.101243       | -122.75362       | 64386             |
| Mendocino     | 39.4381191      | -123.39113       | 86749             |
| Nevada        | 39.3039477      | -120.76273       | 99755             |
| Placer        | 39.0616723      | -120.72406       | 398329            |
| Plumas        | 40.0035599      | -120.83952       | 18807             |
| Shasta        | 40.7639142      | -122.03969       | 180080            |
| Sierra        | 39.577135       | -120.52007       | 3005              |
| Sutter        | 39.0341754      | -121.69459       | 96971             |
| Tehama        | 40.1257094      | -122.23702       | 65084             |
| Trinity       | 40.6491767      | -123.11471       | 12285             |
| Yuba          | 39.2625593      | -121.35356       | 78668             |

Table S2: List of counties in the states of North and South Carolina for which CDC deaths and cases were retrieved.

| <b>County</b> | <b>Latitude</b> | <b>Longitude</b> | <b>Population</b> |
|---------------|-----------------|------------------|-------------------|
| Anson         | 34.9740324      | -80.099533       | 24446             |
| Bladen        | 34.6129624      | -78.561801       | 32722             |
| Brunswick     | 34.070565       | -78.228142       | 142820            |
| Cabarrus      | 35.3877799      | -80.552672       | 216453            |
| Chatham       | 35.7039442      | -79.255415       | 74470             |
| Columbus      | 34.2674408      | -78.658014       | 55508             |
| Cumberland    | 35.0476213      | -78.826232       | 335509            |
| Davidson      | 35.791155       | -80.212566       | 167609            |
| Davie         | 35.9309993      | -80.544966       | 42846             |
| Duplin        | 34.9344981      | -77.931405       | 58741             |
| Hoke          | 35.018883       | -79.236517       | 55234             |
| Iredell       | 35.8095051      | -80.874313       | 181806            |
| Johnston      | 35.51745        | -78.366227       | 209339            |
| Lee           | 35.4762315      | -79.175694       | 61779             |
| Mecklenburg   | 35.2446927      | -80.831767       | 1110356           |
| Moore         | 35.3088526      | -79.484742       | 100880            |
| Randolph      | 35.7101509      | -79.805703       | 143667            |
| Richmond      | 35.0041772      | -79.74491        | 44829             |
| Robeson       | 34.642445       | -79.102505       | 130625            |
| Sampson       | 34.9882037      | -78.369141       | 63531             |
| Scotland      | 34.8386299      | -79.475798       | 34823             |
| Stanly        | 35.3164781      | -80.250932       | 62806             |
| Chesterfield  | 34.641374       | -80.156401       | 45650             |
| Darlington    | 34.3335834      | -79.960275       | 66618             |
| Dillon        | 34.3900779      | -79.377419       | 30479             |
| Florence      | 34.0236175      | -79.701893       | 138293            |
| Horry         | 33.9212828      | -78.995553       | 354081            |
| Kershaw       | 34.3398825      | -80.587632       | 66551             |
| Lancaster     | 34.6827084      | -80.70513        | 98012             |
| Lee           | 34.1639309      | -80.256907       | 16828             |
| Marion        | 34.0785975      | -79.364008       | 30657             |
| Marlboro      | 34.5990558      | -79.675612       | 26118             |
| Richland      | 34.0179126      | -80.902672       | 415759            |
| Sumter        | 33.9182653      | -80.379423       | 106721            |

## **Statistical Approach**

We calculate the correlation between AOD and the number of fatalities or cases per million population using the standard least squares method, which is suitable for this study since we are only concerned with these two variables (e.g., Cantrell et al., 2008). The analysis of the causal factors deriving this correlation is beyond the scope of this study.

Table S3: List of counties in the state of Illinois for which CDC deaths and cases were retrieved.

| <b>County</b> | <b>Latitude</b> | <b>Longitude</b> | <b>Population</b> |
|---------------|-----------------|------------------|-------------------|
| Boone         | 42.3235928      | -88.823458       | 53544             |
| Cook          | 41.8414485      | -87.816588       | 5150233           |
| DeKalb        | 41.893733       | -88.769585       | 104897            |
| DuPage        | 41.8511697      | -88.086427       | 922921            |
| Grundy        | 41.285696       | -88.419057       | 51054             |
| Kane          | 41.9384273      | -88.428614       | 532403            |
| Kankakee      | 41.1374699      | -87.862053       | 109862            |
| Kendall       | 41.5908101      | -88.428696       | 128990            |
| LaSalle       | 41.3442613      | -88.886339       | 108669            |
| McHenry       | 42.3245117      | -88.452482       | 307774            |
| Will          | 41.4461927      | -87.978627       | 690743            |

Table S4: List of correlation parameters for the case fatality ratio (deaths per number of confirmed cases) and mortality rate per AOD (<0.2) for various regions.

| Covid-19 variant | Correlation Type    | North and South Carolina   |                | California      |                | Illinois       |                |
|------------------|---------------------|----------------------------|----------------|-----------------|----------------|----------------|----------------|
|                  |                     | Slope                      | R <sup>2</sup> | Slope           | R <sup>2</sup> | Slope          | R <sup>2</sup> |
| <b>Alpha</b>     | Case fatality ratio | 0.013                      | 0.93           | 0.011           | 0.89           | 0.013          | 0.65           |
|                  | Mortality rate/AOD  | 10.5                       | 0.85           | 8.5             | 0.83           | 52.1           | 0.76           |
| <b>Delta</b>     | Case fatality ratio | 0.011                      | 0.81           | 0.012           | 0.90           | 0.009          | 0.94           |
|                  | Mortality rate/AOD  | 39.6                       | 0.89           | N/A             | N/A            | 28.3           | 0.94           |
| <b>Omicron</b>   | Case fatality ratio | BA.1: 0.007<br>BA.2: 0.003 | 0.91<br>0.57   | 0.011<br>0.0017 | 0.61<br>0.53   | 0.008<br>0.001 | 0.94<br>0.92   |
|                  | Mortality rate/AOD  | N/A                        | N/A            | N/A             | N/A            | N/A            | N/A            |

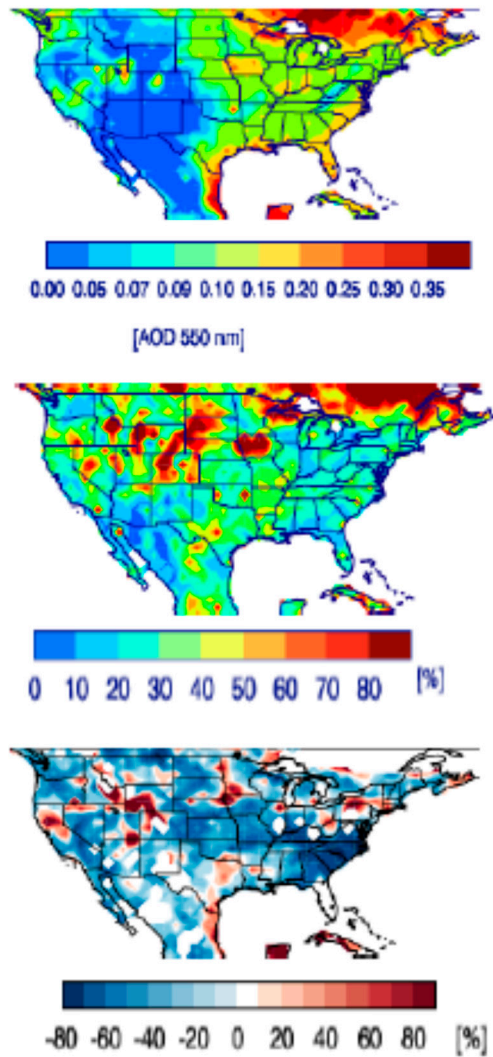

Figure S1: Top panel: Mean AOD levels during the reference period (2010–2019); Middle panel: detrended interannual variability (IAV) of the reference period; Bottom panel: Significant relative change (sig  $\Delta$ ) during the lockdown period of the COVID-19 pandemic. Blank areas in the last row (sig  $\Delta$ ) refer to insignificant differences. Adopted from Elshorbany et al., 2021.

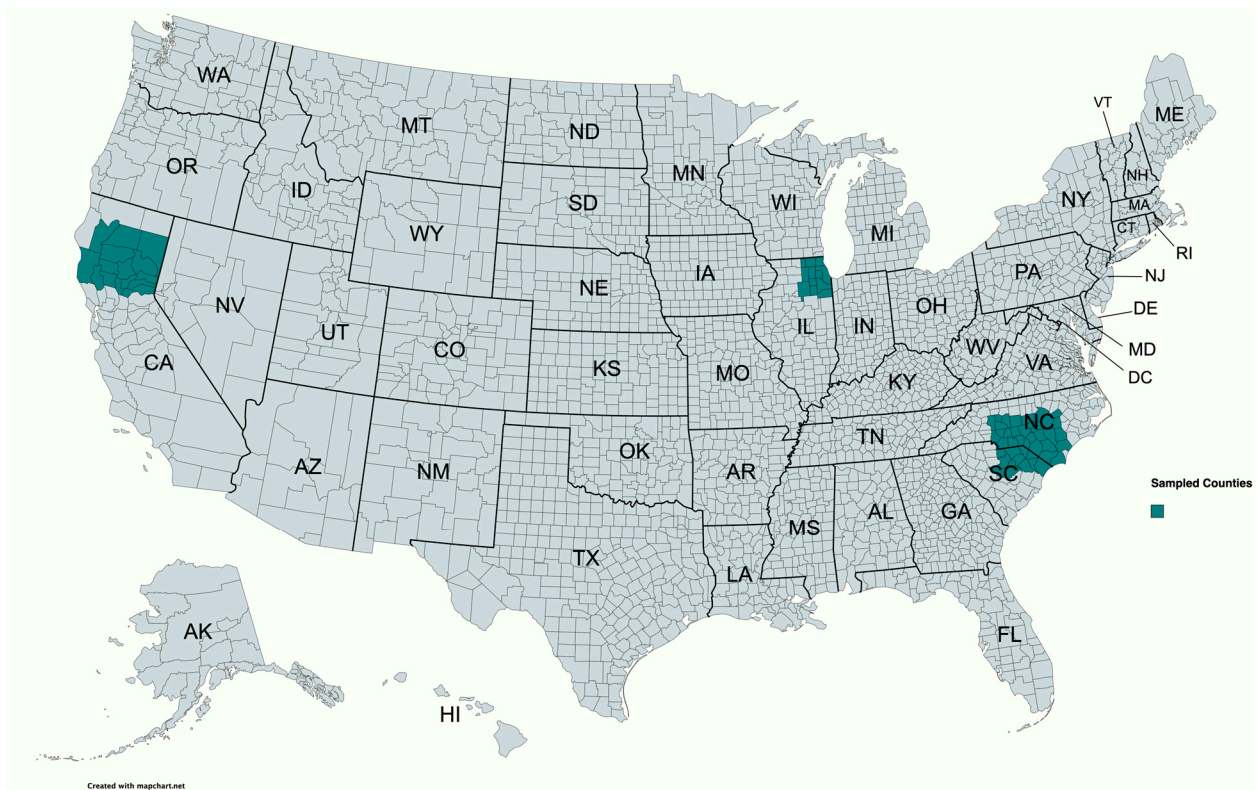

Figure S2: The selected regions used for the analysis in each state are marked. Adapted from US county maps, 2023.
